# Supplementary material
Source: PubMed Central journal article supplement (PMC8115630)
Supplement: 41396_2020_850_MOESM2_ESM.pdf [file 41396_2020_850_MOESM2_ESM.pdf]

## **Supplementary Information**

Glycogen Metabolism of the Anammox Bacterium “*Candidatus Brocadia sinica*”

By

Satoshi Okabe <sup>1,\*</sup> Amrini Amalia Shafdar <sup>1</sup>, Kanae Kobayashi <sup>1</sup>,  
Lei Zhang <sup>1</sup> and Mamoru Oshiki <sup>1</sup>

<sup>1</sup> Division of Environmental Engineering, Faculty of Engineering,  
Hokkaido University, North-13, West-8, Kita-ku, Sapporo Hokkaido  
060-8628, Japan

Supplementary information contains 1 Texts, 8 Figures, and 9 Tables.

## Bacterial glycogen synthesis pathways

The GlgC-GlgA pathway has been known as the classical glycogen pathway. In this pathway glycogen is synthesized from glucose-1-phosphate (Glc-1P) by three enzyme actions catalyzed by glucose-1-phosphate adenylyltransferase (GlgC), glycogen synthase (GlgA) and glycogen branching enzyme (GlgB) (reviewed by Preiss, 2006). The Rv3032 pathway is associated with methylglucose lipopolysaccharide biosynthesis (Jackson and Brennan, 2009). Glucose-1-phosphate is also a primary substrate of glycogen in this pathway. An alternative branching enzyme (Rv3031) catalyzes formation of branched glucan chains having  $\alpha$ -1,6-glycosidic linkages. In contrast, the GlgE pathway utilizes a disaccharide phosphate (maltose 1-phosphate) as the building block (Kalscheuer *et al.*, 2010). Maltose 1-phosphate is generated from trehalose in two steps catalyzed by Maltose  $\alpha$ -glucosyltransferase/ $\alpha$ -amylase (TreS) and maltokinase (Pep2). On the other hand, glycogen is degraded to glucose-1-phosphate by debranching enzyme (GlgX) and glycogen phosphorylase (GlgP) or to trehalose via the (TreX)-TreY-TreZ pathway (Chandra *et al.*, 2011).

## References

1. Chandra, G., Chater, K. F., and Bronemann, S. (2011) Unexpected and widespread connections between bacterial glycogen and trehalose metabolism. *Microbiol* **157**: 1565-1572.
2. Jackson, M., and Brennan, P.J. (2009) Polymethylated polysaccharides from mycobacterium species revisited. *J Biol Chem* **284**: 1949-1953.
3. Kalscheuer, R., Syson, K., Veeraraghavan, U., Weinrick, B., Biermann, K. E., Liu, Z., Sacchettini, J.C., Besra, G., Bornemann, S., and Jacobs, W. R., Jr. (2010) Self-poisoning of Mycobacterium tuberculosis by targeting GlgE in an  $\alpha$ -glucan pathway. *Nat Chem Biol* **6**: 376-384.
4. Preiss, J. (2006) Bacterial glycogen inclusions: enzymology and regulation of synthesis. In *Microbiology Monographs*, pp. 71-108. Edited by J. M. Shively. Heidelberg, Germany, Springer.

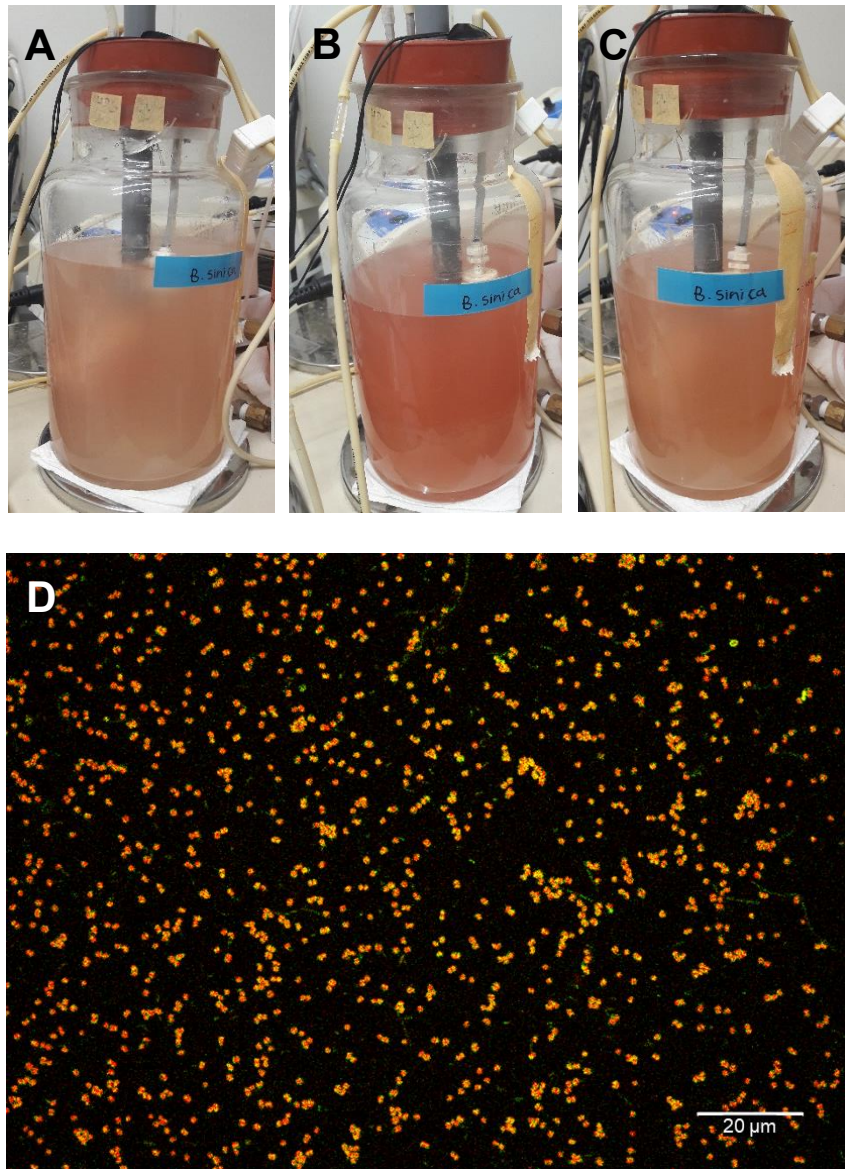

**Figure S1.** “*Ca. B. sinica*” culture in the membrane bioreactor (MBR) during growing phase (A), near-zero growth phase (B), and starvation phase (C), respectively. (D) FISH image of the MBR culture showing free-living planktonic cells of “*Ca. B. sinica*” after hybridization with Alexa555-labeled probe AMX820 and Alexa488-labeled probes EUB338, EUB338II and EUB338III (bacterial universal probes). “*Ca. B. sinica*” made up more than 96% of total population. Scale represents 20 μm.

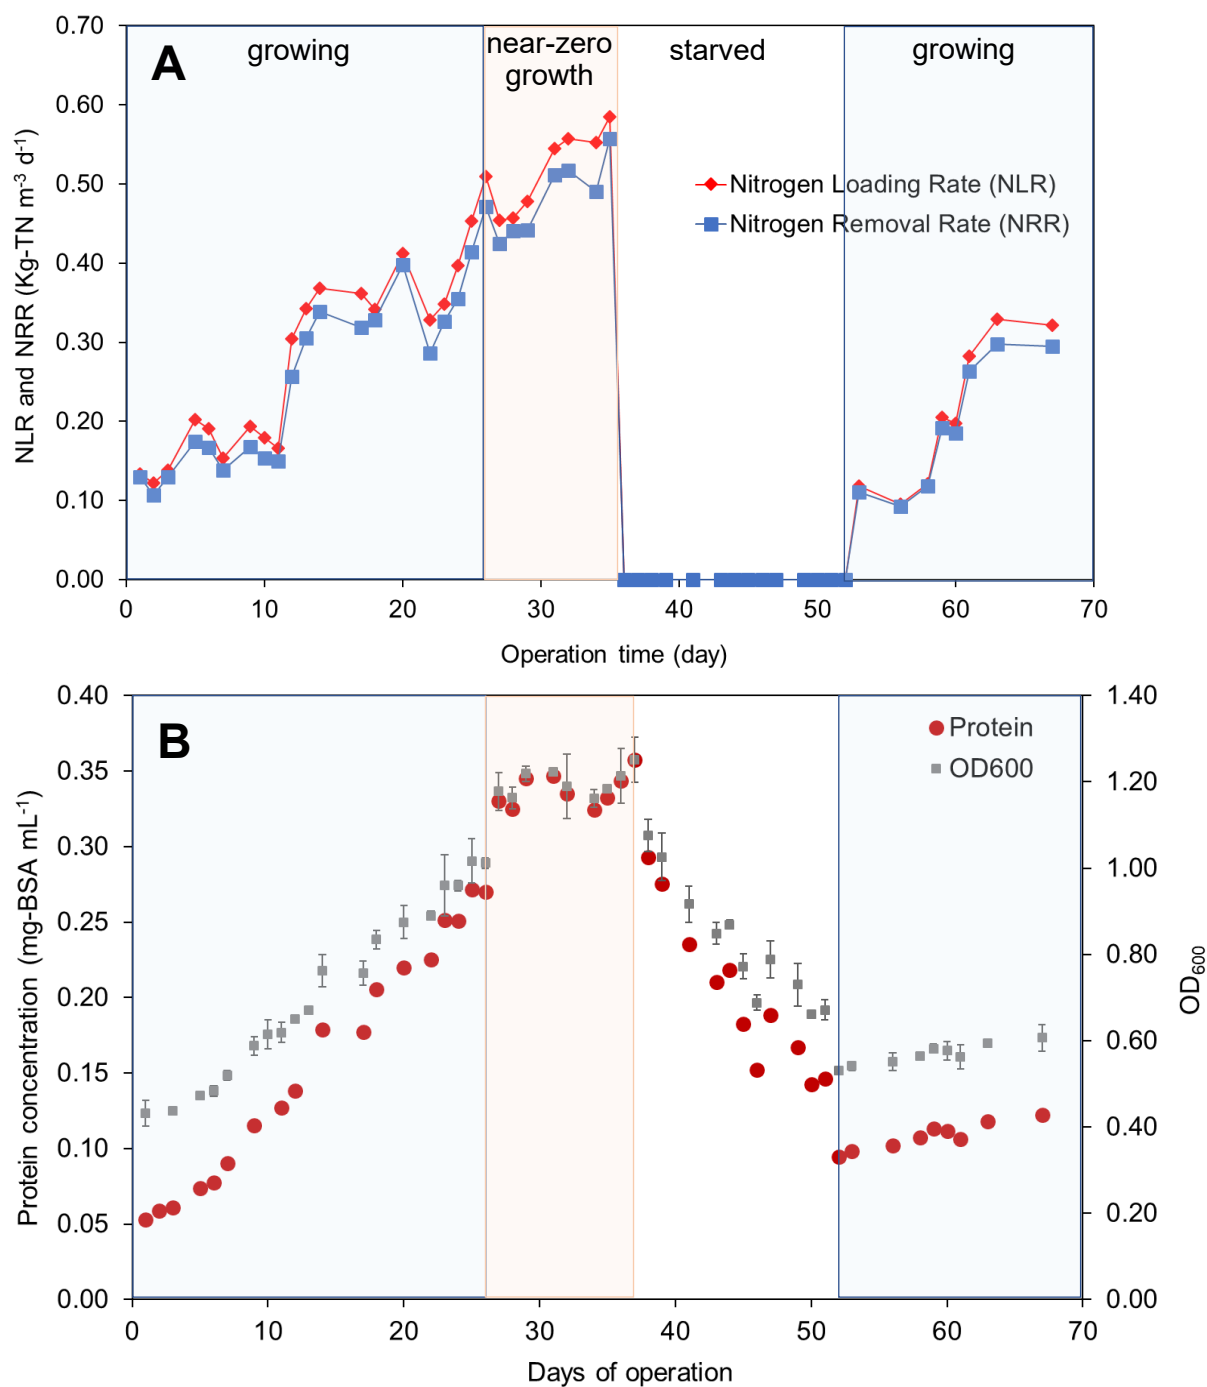

**Figure S2.** Time course of nitrogen ( $\text{NH}_4^+$  and  $\text{NO}_2^-$ ) loading rate (NLR) and removal rate (NRR) (A) and biomass concentration (protein and  $\text{OD}_{600}$ ) (B) in a MRB during approx. 70 days of continuous operation (Experimental Run-1). Blue, orange, and white area indicate the growing phase, near-zero growth phase, and starved phase, respectively. The error bars show SD of duplicate measurement.

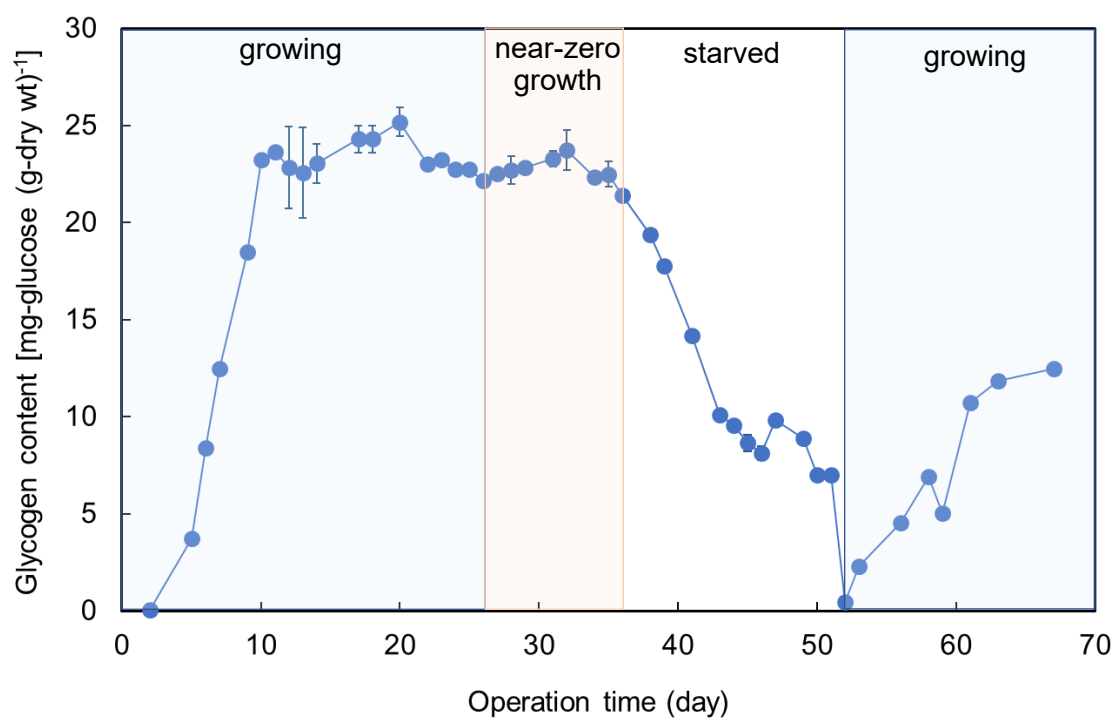

**Figure S3.** Change in intracellular glycogen content in “*Ca. B. sinica*” with time (Experimental Run-1). Glycogen accumulation was immediately observed when the substrate supply was resumed after 16-day starvation. Blue, orange, and white area indicate the growing phase, near-zero growth phase, and starved phase, respectively. The error bars show SD of duplicate measurement.

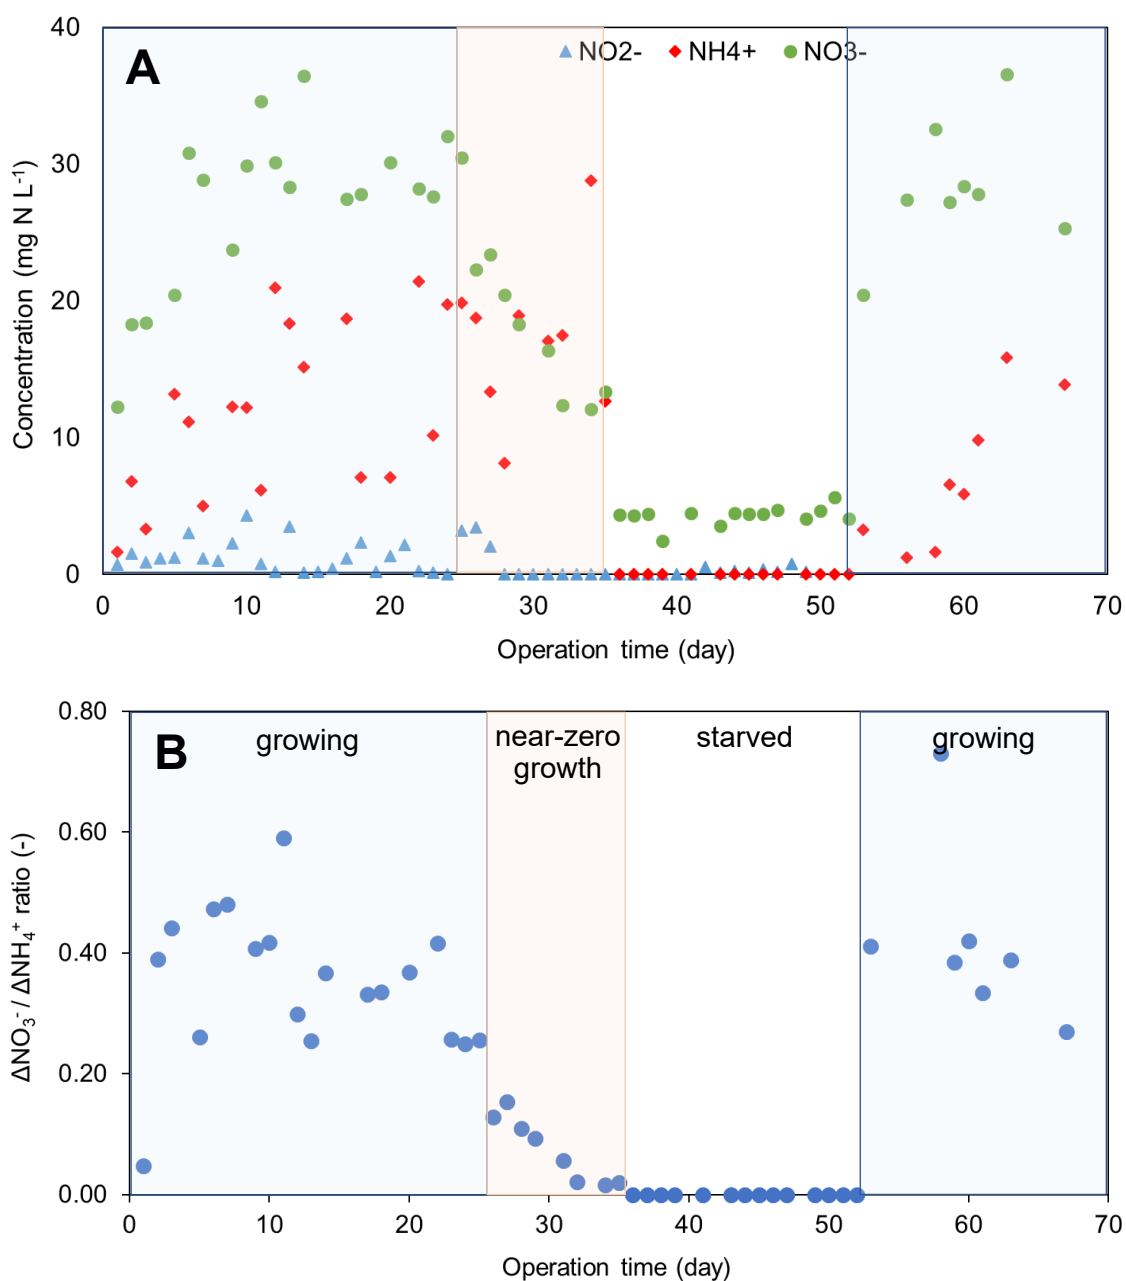

**Figure S4.** (A) Change in the concentrations of  $\text{NH}_4^+$ ,  $\text{NO}_2^-$ , and  $\text{NO}_3^-$  in MBR culture medium with time. (B) Change in the stoichiometric ratios of produced  $\text{NO}_3^-$  and consumed  $\text{NH}_4^+$  ( $0.355 \pm 0.119$  in the growing phase,  $0.095 \pm 0.079$  in the near-zero growth phase, and  $0.420 \pm 0.147$  in the 2<sup>nd</sup> growing phase ( $P < 0.0001$ )), showing that the reducing power (equivalent) for  $\text{CO}_2$  fixation generated from  $\text{NO}_2^-$  oxidation to  $\text{NO}_3^-$  decreased under near-zero growth phase (Experimental Run-1).

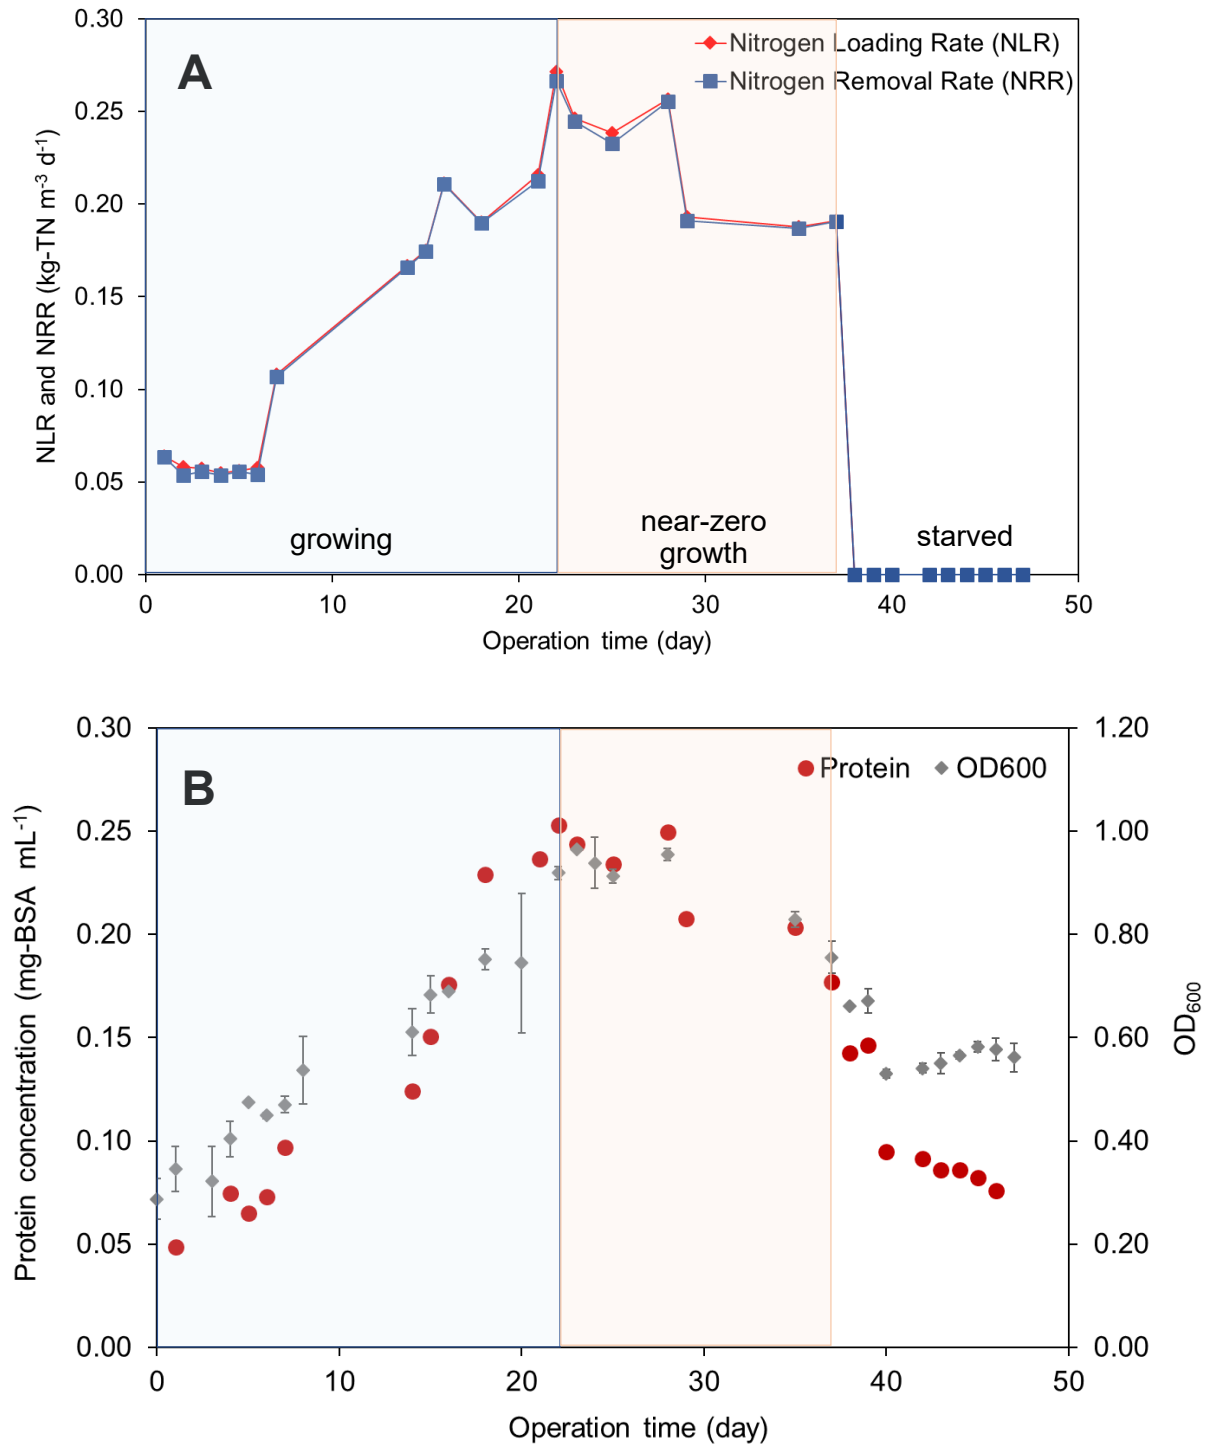

**Figure S5.** Time course of nitrogen ( $\text{NH}_4^+$  and  $\text{NO}_2^-$ ) loading rate (NLR) and removal rate (NRR) (A) and biomass concentration (protein and  $\text{OD}_{600}$ ) (B) in a MRB during approx. 50 days of continuous operation (Experimental Run-2). Biomass cultures were collected for proteomic analysis in the growing (day 18), near-zero growth (day 31), and starved (day 50) phase, respectively. The error bars show SD of duplicate measurement.

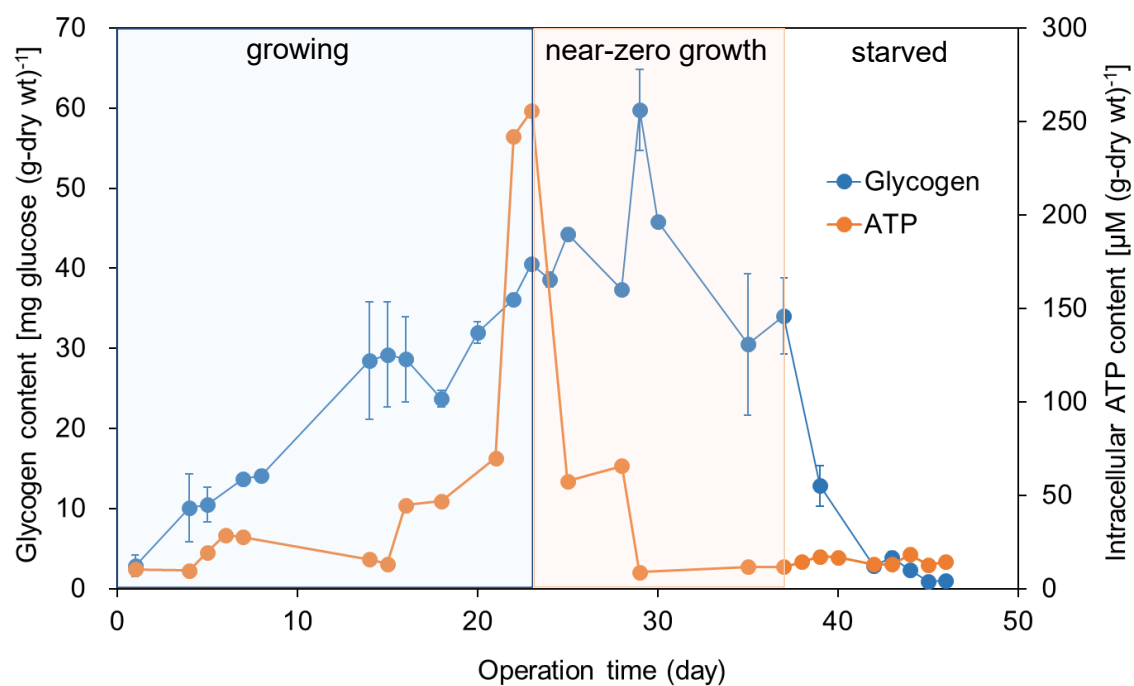

**Figure S6.** Change in intercellular glycogen content and ATP content in “*Ca. B. sinica*” with time (Experimental Run-2). Blue, orange, and white area indicate the growing phase, near-zero growth phase, and starved phase, respectively. The error bars represent the standard deviations of duplicate measurements. The error bars show SD of duplicate measurement.



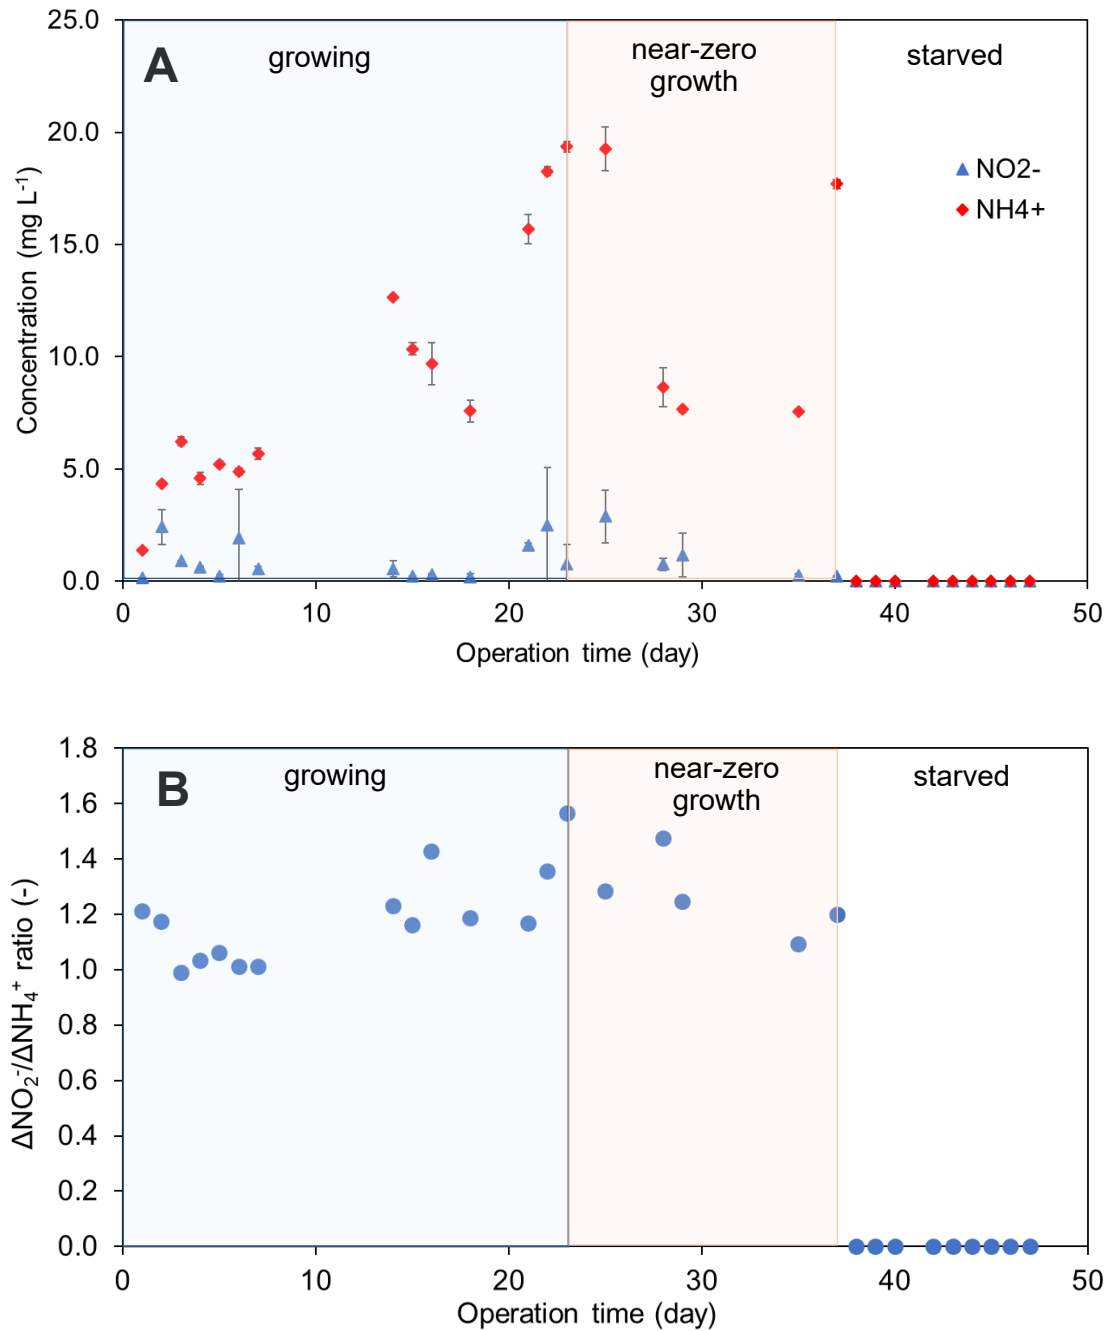

**Figure S7.** (A) Change in the concentrations of  $\text{NH}_4^+$  and  $\text{NO}_2^-$  in MBR culture medium with time. (B) Change in the stoichiometric ratio of produced  $\text{NO}_2^-$  and consumed  $\text{NH}_4^+$ , showing that the reducing power (equivalent) for  $\text{CO}_2$  fixation obtained from  $\text{NO}_2^-$  oxidation to  $\text{NO}_3^-$  decreased under near-zero growth phase. (Experimental Run-2) Blue, orange, and white area indicate the growing phase, near-zero growth phase, and starved phase, respectively. The error bars indicate the standard deviations of duplicate measurements. The error bars show SD of duplicate measurement.

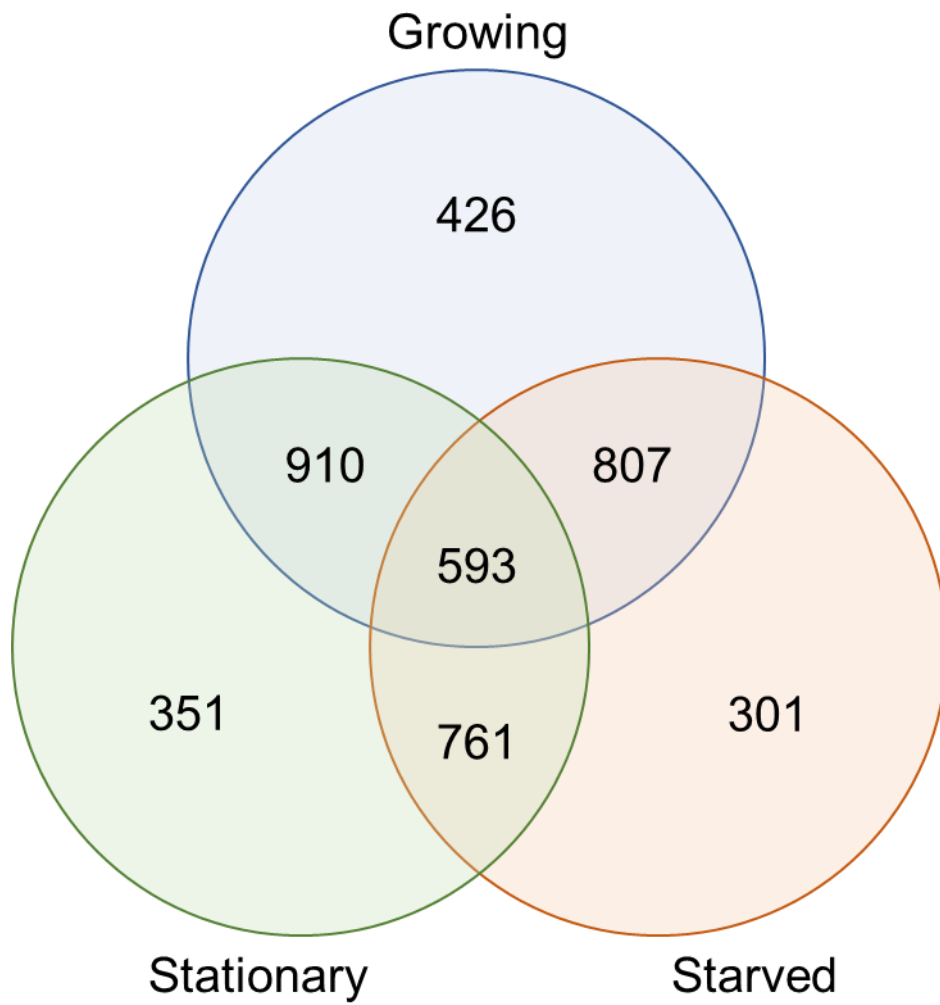

**Figure S8.** Venn diagram showing numbers of shared genes of “*Ca. B. sinica*” growing in three different growth conditions.
